# Supplementary material
Source: Springer Nature journal article supplement (https://www.springermedizin.de/resource/supplementary/13054_2013_2561_MOESM1_ESM.pdf/9714200)

Number of Patients

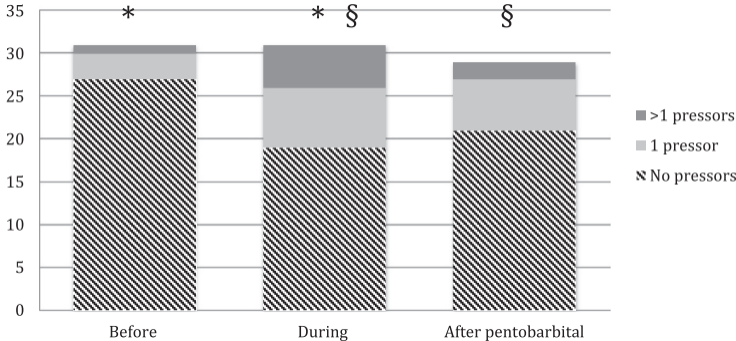

Supplement: MOESM1 [file 9714200]
